# Supplementary material
Source: Springer Nature journal article supplement (https://www.springermedizin.de/resource/supplementary/12889_2014_6402_MOESM3_ESM.pdf/9497810)

Moderator=0

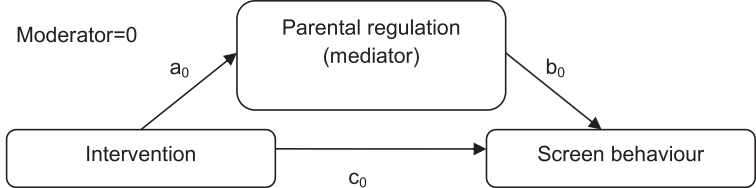

$$H_0: a_0 * b_0 - a_1 * b_1 = 0$$

$$H_1: a_0 * b_0 - a_1 * b_1 \neq 0$$

Moderator=1

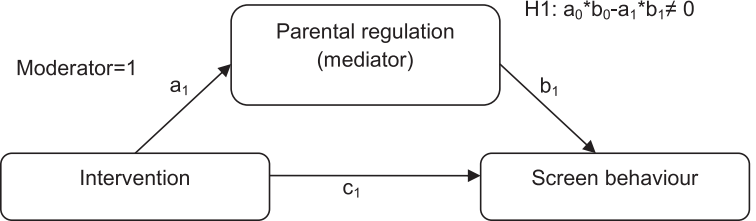

Supplement: MOESM3 [file 9497810]
